## Introduction

**S111** Introduction to the 4th World Congress on Controversies to Consensus in Diabetes, Obesity and Hypertension (CODHy)  
S. Del Prato, I. Raz

## I. Diabetes Pathophysiology

**S113** Role of reduced  $\beta$ -cell mass versus impaired  $\beta$ -cell function in the pathogenesis of type 2 diabetes  
J.J. Meier, R.C. Bonadonna

**S120** Genetic screening for the risk of type 2 diabetes: worthless or valuable?  
V. Lyssenko, M. Laakso

**S127** Pathophysiologic approach to therapy in patients with newly diagnosed type 2 diabetes  
R.A. DeFronzo, R. Eldor, M. Abdul-Ghani

**S139** Guideline approach to therapy in patients with newly diagnosed type 2 diabetes  
I. Raz

**S145** GLP-1 effects on islets: hormonal, neuronal, or paracrine?  
M.Y. Donath, R. Burcelin

## II. Diabetes Therapy

**S149** Is physical exercise a core therapeutical element for most patients with type 2 diabetes?  
P. De Feo, P. Schwarz

**S155** Do we still need pioglitazone for the treatment of type 2 diabetes? A risk-benefit critique in 2013  
G. Schernthaner, C.J. Currie, G.-H. Schernthaner

**S162** In vivo actions of peroxisome proliferator-activated receptors: glycemic control, insulin sensitivity, and insulin secretion  
R. Eldor, R.A. DeFronzo, M. Abdul-Ghani

**S175** Activation of GPR40 as a therapeutic target for the treatment of type 2 diabetes  
C.F. Burant

**S180** How do we continue treatment in patients with type 2 diabetes when therapeutic goals are not reached with oral antidiabetes agents and lifestyle? Incretin versus insulin treatment  
B. Gallwitz, R.G. Bretzel

## III. Insulin Therapy

**S190** Early insulinization to prevent diabetes progression  
I. Raz, O. Mosenzon

**S198** Insulin as an early treatment for type 2 diabetes: ORIGIN or end of an old question?  
S. Del Prato, C. Bianchi, A. Dardano, R. Miccoli

**S205** Is there evidence to support use of premixed or prandial insulin regimens in insulin-naïve or previously insulin-treated type 2 diabetic patients?  
H. Yki-Järvinen, A. Kotronen

**S212** Intensification of insulin therapy for type 2 diabetic patients in primary care: basal-bolus regimen versus premix insulin analogs: when and for whom?  
O. Mosenzon, I. Raz

**S219** Insulin pump for type 2 diabetes: use and misuse of continuous subcutaneous insulin infusion in type 2 diabetes  
Y. Reznik, O. Cohen

**S226** Combining incretin-based therapies with insulin: realizing the potential in type 2 diabetes  
J. Vora

## IV. Diabetes and Cancer

**S233** Epidemiology and molecular mechanisms tying obesity, diabetes, and the metabolic syndrome with cancer  
E.J. Gallagher, D. LeRoith

**S240** Insulin therapy and cancer  
P. Home

**S245** Do GLP-1-based therapies increase cancer risk?  
M.A. Nauck, N. Friedrich

## V. The Heart in Diabetes

**S253** Cardiovascular outcome studies with novel antidiabetes agents: scientific and operational considerations  
B. Hirshberg, A. Katz

**S259** Is glucose control important for prevention of cardiovascular disease in diabetes?  
E. Mannucci, I. Dicembrini, A. Lauria, P. Pozzilli

**S264** The case for: hypoglycemia is of cardiovascular importance  
N.M. Lalic

**S267** Cardiovascular importance of hyperglycemia and hypoglycemia  
I. Tkáč

**S272** Glycemic variability: both sides of the story  
A. Ceriello, E.S. Kilpatrick

## VI. Obesity

**S276** Obesity paradox does exist  
V. Hainer, I. Aldhoon-Hainerová

**S282** Defending the con side: obesity paradox does not exist  
E. Standl, M. Erbach, O. Schnell

**S287** Mechanism of metabolic advantages after bariatric surgery: it's all gastrointestinal factors versus it's all food restriction  
F.K. Knop, R. Taylor

**S292** Targets for body fat, blood pressure, lipids, and glucose-lowering interventions in healthy older people  
C. Tsigos, R. Bitzur, Y. Kleinman, H. Cohen, A. Cahn, G. Brambilla, G. Mancia, G. Grassi

## VII. Hypertension

**S301** Individualization of antihypertensive drug treatment  
G. Mancia, G. Grassi

**S307** Ambulatory blood pressure monitoring in the diagnosis and management of hypertension  
E. Grossman

**S312** Prognostic value of blood pressure variability and average blood pressure levels in patients with hypertension and diabetes  
G. Parati, J.E. Ochoa, P. Salvi, C. Lombardi, G. Bilo

**S325** Intolerance to statins: mechanisms and management  
R. Bitzur, H. Cohen, Y. Kamari, D. Harats
